# Supplementary material for: High OX-40 expression in the tumor immune infiltrate is a favorable prognostic factor of overall survival in non-small cell lung cancer
Source: PubMed Central journal article supplement (PMC6915970; doi:10.1186/s40425-019-0827-2), 2019-12-16
Supplement: 40425_2019_827_MOESM1_ESM.pdf [file 40425_2019_827_MOESM1_ESM.pdf]

**Table S1: Spearman's correlation between OX-40 and other IHC immune markers**

|            | Rho   | P-value  |
|------------|-------|----------|
| FOXP3      | 0.691 | 1.77e-15 |
| CD3        | 0.620 | 6.34e-12 |
| CD4        | 0.610 | 1.56e-11 |
| PD1        | 0.572 | 4.97e-10 |
| CD45RO     | 0.567 | 7.82e-10 |
| CD8        | 0.565 | 9.17e-10 |
| Granzyme B | 0.558 | 1.62e-09 |
| PD-L1      | 0.474 | 4.13e-06 |
| CD68       | 0.429 | 8.37e-06 |
| ICOS       | 0.150 | 0.157    |

Figure S1

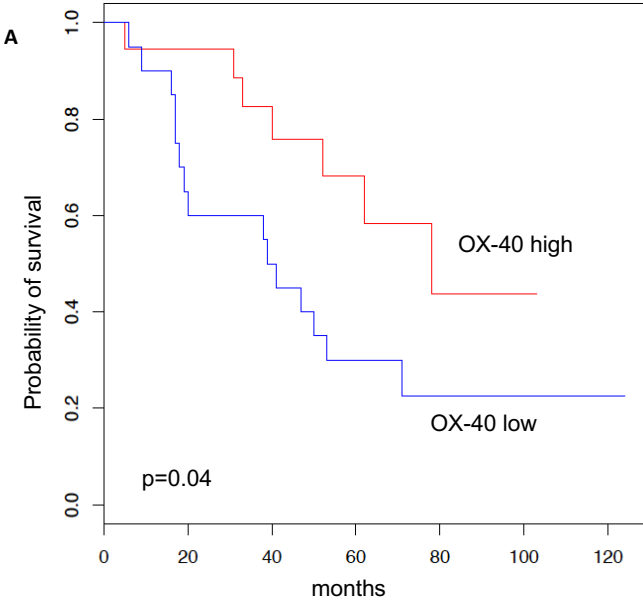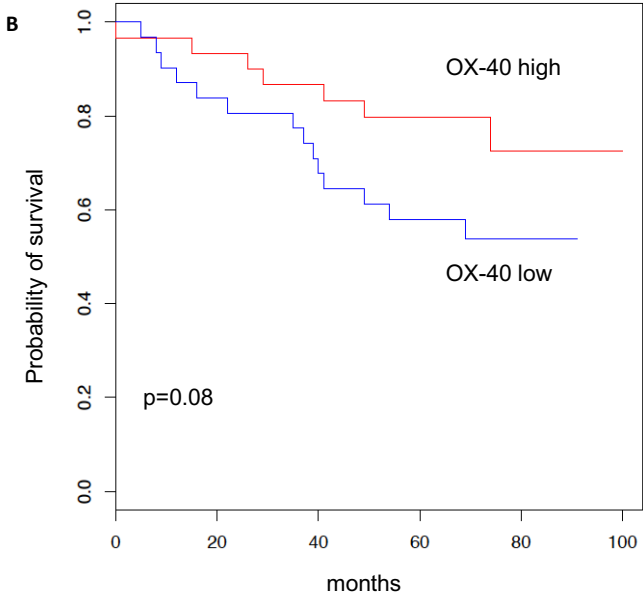

Figure S1. Overall survival Kaplan-Meier curves of OX-40 protein expression in squamous cell carcinoma histology (A) and adenocarcinoma histology (B) by median value.

**Figure S2**

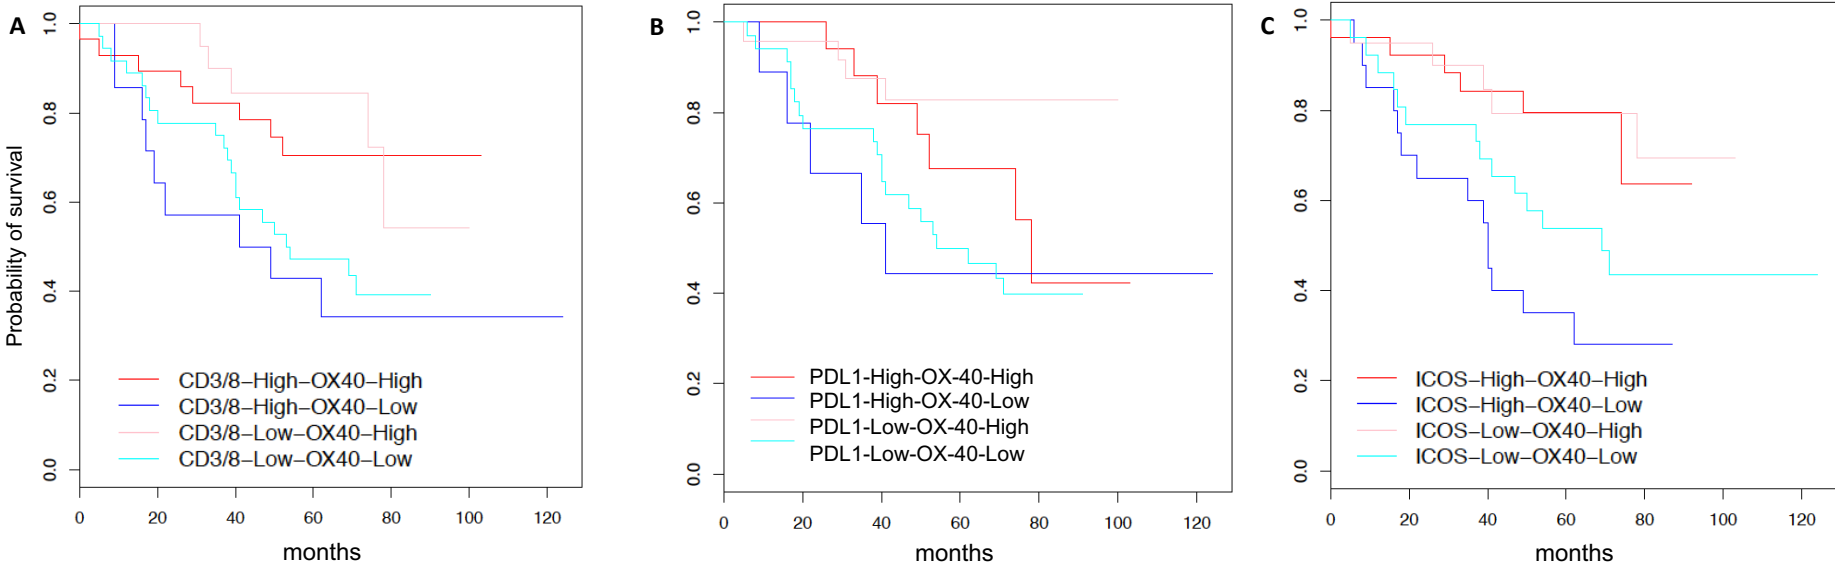

Figure S2. Overall survival Kaplan-Meier curves by OX-40 IHC level and CD3/CD8/OX-40 level (A), ICOS/OX-40 level (B), PD-L1/OX-40 level (C).
